# Supplementary material for: Confined organization of Au nanocrystals in glycolipid nanotube hollow cylinders
Source: Royal Society of Chemistry journal article supplement (doi:10.1039/b313100a), 2004-01-01
Supplement: b313100a.doc [file b313100a.doc]

**Supplementary** **data**

# Confined organization of Au nanocrystals in glycolipid nanotube hollow cylinders

Bo Yang,a Shoko Kamiya,b Kaname Yoshida,a and Toshimi Shimizu*,a,b

a *Nanoarchitectonics Research Center (NARC), National Institute of Advanced Industrial Science and Technology (AIST), Tsukuba Central 5, 1-1-1 Higashi, Tsukuba, Ibaraki 305-8565, Japan*

b CREST, Japan Science and Technology Cooperation (JST), Tsukuba Central 4, 1-1-1 Higashi, Tsukuba, Ibaraki 305-8562, Japan. E-mail: [tshmz-shimizu@aist.go.jp](mailto:tshmz-shimizu@aist.go.jp)

**Synthesis of *N*-(11-*cis*-octadecenoyl)--D-glucopyranosylamine**

Solid ammonium hydrogen carbonate (10 g) was added to an aqueous solution of D-(+)-glucose (1.00 g, 5.55 mmol in 25 mL). The mixture was stirred in an open vessel at 37ºC for 5 days. Ammonium hydrogen carbonate (the total amount of 50 g) was added at intervals to keep a portion of solid salt present in the mixture. The reaction mixture was cooled to 5ºC to precipitate ammonium hydrogen carbonate after TLC (eluent, ethyl acetate : acetic acid : methanol : water = 4 : 3 : 3 : 1 by volume) indicated no more conversion (Rf = 0.40). The supernatant was deionized using a micro-acilyzer G1 (Asahi Chemical) equipped with an ion-exchange membrane aciplex® cartridge AC-110-10 and then lyophilized. The yield was 0.88 g (88 %). To the solution of *cis*-vaccenic acid (282 mg, 1.0 mmol) in dimethyl sulfoxide (0.5 mL) was added a mixture of 1-hydroxybenzotriazol (HOBt; 306 mg, 2.0 mmol) and (benzotriazol-1-yloxy)-tris-(dimethylamino)phosphonium hexafluorophosphate (BOP; 1.77 g, 4.0 mmol) in dimethyl sulfoxide (1.0 mL) and the reaction mixture was stirred for 10 min. -D-Glucosylamine solution in dimethyl sulfoxide (1.49 g, 8.3 mmol/1.0 ml) was then added and the mixture was stirred at r.t. over 5 h. The solution was chromatographed 4 times on silica gel columns (eluent, chloroform : methanol = 4 : 1) and a TSKgel HW-40S column (eluent, methanol). The yield was 85 mg (19%).

1H-NMR (in dimethyl sulfoxide-*d6*, at 25ºC) :  0.85 (t, CH3); 1.24 (m, CH2); 1.47 (m, NHCOCH2C*H2*); 1.98 (m, CH=CHC*H2*); 2.08 (m, NHCOC*H*2); 3.003.65 (m, H-2, H-3, H-4, H-5, H-6a, H-6b); 4.434.94 (m, OH-2, OH-3, OH-4, OH-6); 4.69 (dd, J1,2 = 9.2 Hz, H-1); 5.33 (m, C*H2*=C*H2*); 8.22 ppm (d, J1,NH = 9.2 Hz, N*H*CO). 13C-NMR (in methanol-*d*4, at 25ºC);  12.535.3 (hydrocarbon); 60.8 (C-6); 69.5, 72.0, 77.1 and 77.7 (C-2, C-3, C-4, C-5); 73.1 (C-3); 79.1 (C-1); 128.9 (CH2=CH2); 175.5 ppm (NHCO).
